# Supplementary material
Source: PubMed Central journal article supplement (PMC9006492)
Supplement: 41581_2022_570_MOESM1_ESM.pdf [file 41581_2022_570_MOESM1_ESM.pdf]

**Supplementary information**

---

**COVID-19 and kidney disease: insights from epidemiology to inform clinical practice**

---

In the format provided by the authors and unedited

**Supplementary Table 1 | Barriers to healthcare and potential study biases**

| Population               | Barriers to accessing healthcare pre-pandemic                                                                                  | Barriers to COVID-19 testing                                                                                                                                                                                                                    | Barriers to accessing healthcare during the COVID-19 pandemic                                                                                                                                                                                                                                                                                                         | Biases                                                                                                                                                                                                    | Potential design solutions                                                                                                                                                                    |
|--------------------------|--------------------------------------------------------------------------------------------------------------------------------|-------------------------------------------------------------------------------------------------------------------------------------------------------------------------------------------------------------------------------------------------|-----------------------------------------------------------------------------------------------------------------------------------------------------------------------------------------------------------------------------------------------------------------------------------------------------------------------------------------------------------------------|-----------------------------------------------------------------------------------------------------------------------------------------------------------------------------------------------------------|-----------------------------------------------------------------------------------------------------------------------------------------------------------------------------------------------|
| <b>Dialysis</b>          | <p>Out-of-pocket costs to access care.</p> <p>May vary between in-centre haemodialysis patients and home therapy patients.</p> | <p>Universal testing limited by resources, government policy.</p> <p>Variable testing approaches in different phases of the pandemic.</p> <p>Less access to testing for home therapy patients compared to in-centre haemodialysis patients.</p> | <p>AKI burden during the pandemic and shortages of dialysis resources/personnel.</p> <p>Reduction in frequency of dialysis sessions to reduce exposure.</p> <p>Lack of dedicated transport for infected/exposed patients and those with suspected infection (leading to hospitalization for “social reasons”).</p> <p>Pressure to shift to home-based modalities.</p> | <p><b>Selection bias:</b></p> <p>Where testing rates low, incidence falsely low; more severe cases likely to be tested so outcomes such as critical care admission and death have falsely high rates.</p> | <p>Investigating dialysis populations which use surveillance testing for infection control purposes (both denominator and SARS-CoV-2 infections systematically assessed in all patients).</p> |
| <b>Kidney transplant</b> | <p>May vary based on clinical</p>                                                                                              | <p>Reduction in follow-up visits</p>                                                                                                                                                                                                            | <p>Reduction in follow-up visits to reduce</p>                                                                                                                                                                                                                                                                                                                        | <p><b>Selection bias:</b></p>                                                                                                                                                                             | <p>Large prospective cohorts with regular testing to be able to</p>                                                                                                                           |

|  |                                                                                                                                                                                     |                                                                                                                                           |                                                                                                                                                                                                                                                                                                                                                                                                                    |                                                                                                                                                                                                                                                                                                                                                                                                                                                                                                                                                   |                                                                                                                                                                                                                                                                                                                                                                                             |
|--|-------------------------------------------------------------------------------------------------------------------------------------------------------------------------------------|-------------------------------------------------------------------------------------------------------------------------------------------|--------------------------------------------------------------------------------------------------------------------------------------------------------------------------------------------------------------------------------------------------------------------------------------------------------------------------------------------------------------------------------------------------------------------|---------------------------------------------------------------------------------------------------------------------------------------------------------------------------------------------------------------------------------------------------------------------------------------------------------------------------------------------------------------------------------------------------------------------------------------------------------------------------------------------------------------------------------------------------|---------------------------------------------------------------------------------------------------------------------------------------------------------------------------------------------------------------------------------------------------------------------------------------------------------------------------------------------------------------------------------------------|
|  | <p>characteristics (e.g. more recent recipients or individuals with advanced graft impairment or infectious complications may be seen more frequently than chronic recipients).</p> | <p>to reduce exposure so less likely to be tested, especially early in pandemic and especially when not requiring hospital admission.</p> | <p>exposure; more likely to present late (or not at all) with COVID-19 and non-COVID-19 complications.</p> <p>Well-established relationships with healthcare providers may have meant increased access compared to other groups.</p> <p>Some transplant programmes suspended to minimize exposure of donors and recipients to healthcare settings and to minimize exposure of recipients to immunosuppression.</p> | <p>Incomplete capture of SARS-CoV-2 infection resulting in underestimation of incidence and overestimation of mortality.</p> <p>Biopsy series affected by clinical decision to perform biopsies.</p> <p><b>Misclassification:</b></p> <p>Possible reduced SARS-CoV-2 seroconversion or premature antibody waning resulting in underestimation of seroprevalence.</p> <p><b>Collider bias:</b></p> <p>Risk factor analyses in hospitalized populations affected by who is hospitalized and why; in several studies, more transplant recipients</p> | <p>estimate incidence of mild and asymptomatic infection.</p> <p>Integration of international/national/regional transplant registries to include biopsy reports, rejection episodes and immunosuppression.</p> <p>Report disaggregated outcomes for each organ.</p> <p>Work with patients to capture symptoms and health needs at home, as opposed to only assessing those in hospital.</p> |
|--|-------------------------------------------------------------------------------------------------------------------------------------------------------------------------------------|-------------------------------------------------------------------------------------------------------------------------------------------|--------------------------------------------------------------------------------------------------------------------------------------------------------------------------------------------------------------------------------------------------------------------------------------------------------------------------------------------------------------------------------------------------------------------|---------------------------------------------------------------------------------------------------------------------------------------------------------------------------------------------------------------------------------------------------------------------------------------------------------------------------------------------------------------------------------------------------------------------------------------------------------------------------------------------------------------------------------------------------|---------------------------------------------------------------------------------------------------------------------------------------------------------------------------------------------------------------------------------------------------------------------------------------------------------------------------------------------------------------------------------------------|

|                                                   |                                                                                                                                                                                                                                                                              |                                                                                                                                                   |                                                                                                                                                                                                                                                                                                                                                |                                                                                                                                                                                                                                                                                                                                                                              |                                                                                                                                                                                                                                                                                                                                                                                                    |
|---------------------------------------------------|------------------------------------------------------------------------------------------------------------------------------------------------------------------------------------------------------------------------------------------------------------------------------|---------------------------------------------------------------------------------------------------------------------------------------------------|------------------------------------------------------------------------------------------------------------------------------------------------------------------------------------------------------------------------------------------------------------------------------------------------------------------------------------------------|------------------------------------------------------------------------------------------------------------------------------------------------------------------------------------------------------------------------------------------------------------------------------------------------------------------------------------------------------------------------------|----------------------------------------------------------------------------------------------------------------------------------------------------------------------------------------------------------------------------------------------------------------------------------------------------------------------------------------------------------------------------------------------------|
|                                                   |                                                                                                                                                                                                                                                                              |                                                                                                                                                   |                                                                                                                                                                                                                                                                                                                                                | admitted without respiratory failure compared to other patients (e.g. due to gastrointestinal symptoms and/or graft impairment or as a precaution) so may be less likely to die.                                                                                                                                                                                             |                                                                                                                                                                                                                                                                                                                                                                                                    |
| <b>Chronic kidney disease/acute kidney injury</b> | <p>Low rates of testing for albuminuria +/- eGFR resulting in underdiagnosis of CKD.</p> <p>If CKD present, low awareness to diagnose/code CKD in records.</p> <p>Limited healthcare resource.</p> <p>Multiple co-existing conditions such as hypertension, diabetes and</p> | <p>Universal testing in at risk groups limited by resources and government policies.</p> <p>COVID-19 risk varying depending on time and area.</p> | <p>Limited health-care resource.</p> <p>AKI burden during the pandemic with shortages of dialysis/personnel resources.</p> <p>More CKD patients after the pandemic (newly recognized, due to COVID-19) but CKD may be simply not have been detected prior to infection.</p> <p>Reduction in clinic and hospital visits to reduce exposure;</p> | <p><b>Selection bias:</b></p> <p>Lack of universal testing.</p> <p>If testing rates low, incidence will be falsely low with more severe cases likely to be tested so outcomes (death, hospitalization, critical care admission etc.) are overestimated.</p> <p><b>Misclassification:</b></p> <p>Due to Inaccurate/incomplete coding of CKD.</p> <p><b>Collider bias:</b></p> | <p>If using electronic health records, validate captured kidney populations against external/gold standard data (e.g. surveys, registries).</p> <p>Ensure population-based infection surveillance studies are well-represented with patients from known high-risk groups.</p> <p>Work with patients to capture symptoms/health needs, as opposed to only assessing those who are hospitalized.</p> |

|  |                                                 |  |                                                                                      |                                                                                                                                                           |  |
|--|-------------------------------------------------|--|--------------------------------------------------------------------------------------|-----------------------------------------------------------------------------------------------------------------------------------------------------------|--|
|  | cardiovascular disease among patients with CKD. |  | more likely to present late (or not at all) with COVID-19 and non-COVID-19 diseases. | Those with severe disease more likely to be tested.<br><br>Inadequate follow-up testing of kidney function in people not considered to be at risk of CKD. |  |
|--|-------------------------------------------------|--|--------------------------------------------------------------------------------------|-----------------------------------------------------------------------------------------------------------------------------------------------------------|--|
